# Supplementary material
Source: PubMed Central journal article supplement (PMC9050841)
Supplement: NIHMS1784029-supplement-1.pdf [file NIHMS1784029-supplement-1.pdf]

**Table S1.** Primers and probes used for PCR and colony screening

| Technique                             | Oligonucleotide (5' to 3')        | Description            |
|---------------------------------------|-----------------------------------|------------------------|
| <b>PCR</b>                            |                                   |                        |
| 1st 5' J558                           | AGCCTGACATCTGAGGAC                | 1° PCR, heavy chain    |
| 1 <sup>st</sup> 3' E $\mu$            | GTGGTGT TTTTGCTCAGCCTG            | 1° PCR, heavy chain    |
| 2 <sup>nd</sup> 5' J558-EcoRI         | CACGAATTCGCCTGACATCTGAGGACTCTGC   | 2° PCR, heavy chain    |
| 2 <sup>nd</sup> 3' E $\mu$ -ClaI      | CACATCGATCAGCTACAAGTTTACCTAGTG    | 2° PCR, heavy chain    |
| 1 <sup>st</sup> 5' V $\kappa$ 4       | CGCTTCAGTGGCAGTGGGTCTG            | 1° PCR, light chain    |
| 1 <sup>st</sup> 3' E $\kappa$         | CAGGGTGAACGCCAAATGGCTG            | 1° PCR, light chain    |
| 2 <sup>nd</sup> 5' V $\kappa$ 4-EcoRI | CACGAATTCCTCTCACAATCAGCAGCATGGAGG | 2° PCR, light chain    |
| 2 <sup>nd</sup> 3' E $\kappa$ -ClaI   | CACATCGATCAGCCGCGAGGTCACCCAGTTGTA | 2° PCR, light chain    |
| <b>Hybridization</b>                  |                                   |                        |
| JH139                                 | CATCTGCCACACTCTGCATG              | J <sub>H</sub> 1 probe |
| JH131                                 | CAGGTCATGAAGGACTAGGG              | J <sub>H</sub> 2 probe |
| J $\kappa$ 168                        | CCGTTGTCTATGTCTGTGGC              | J $\kappa$ 1 probe     |
| J $\kappa$ 169                        | TAGGGAGGGTTTTGTGGAGG              | J $\kappa$ 2 probe     |

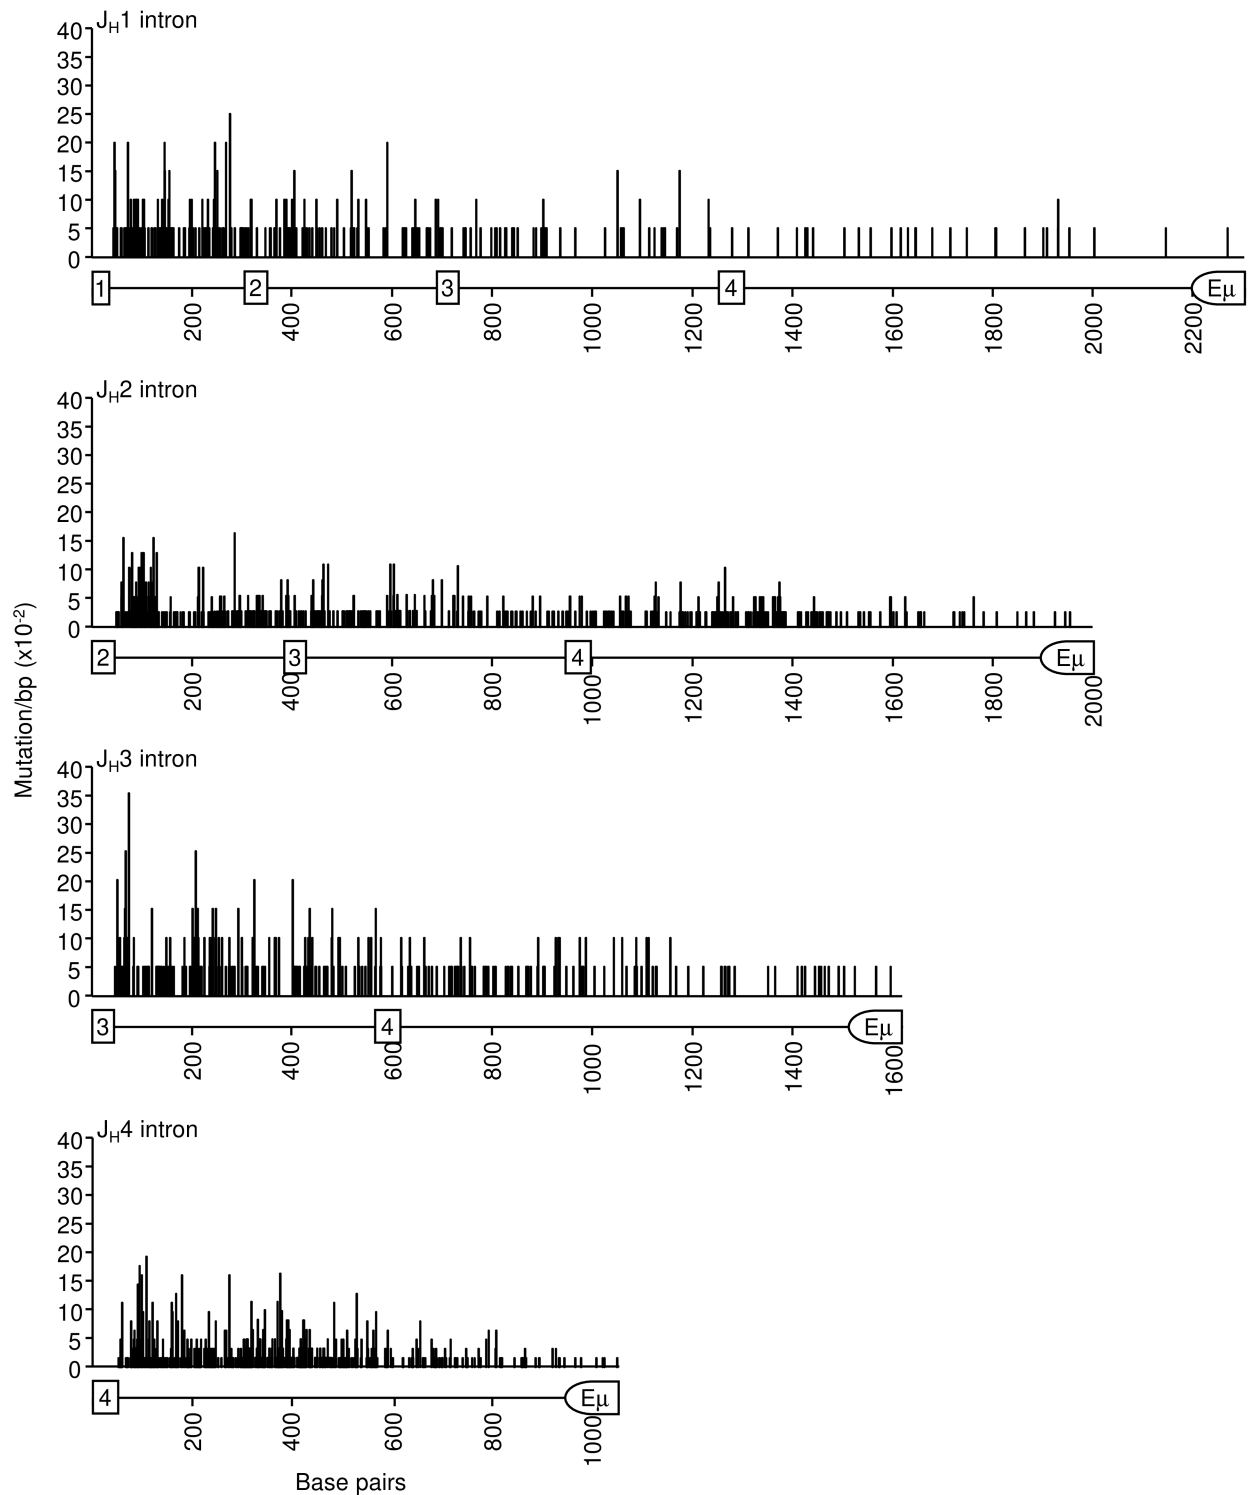

**FIGURE S1.** Mutational distribution in J<sub>H</sub> intron sequences as in Fig. 2, aligned with the beginning of the utilized J segment. Black vertical lines represent the number of mutations/bp  $\times 10^2$  (y-axis) for each residue from VDJ clones utilizing J<sub>H</sub>1, J<sub>H</sub>2, J<sub>H</sub>3, and J<sub>H</sub>4 genes. X-axis depicts the distance from the utilized J segment to E<sub>μ</sub>. Half circle shows the portion of the E<sub>μ</sub> intronic enhancer that was sequenced.

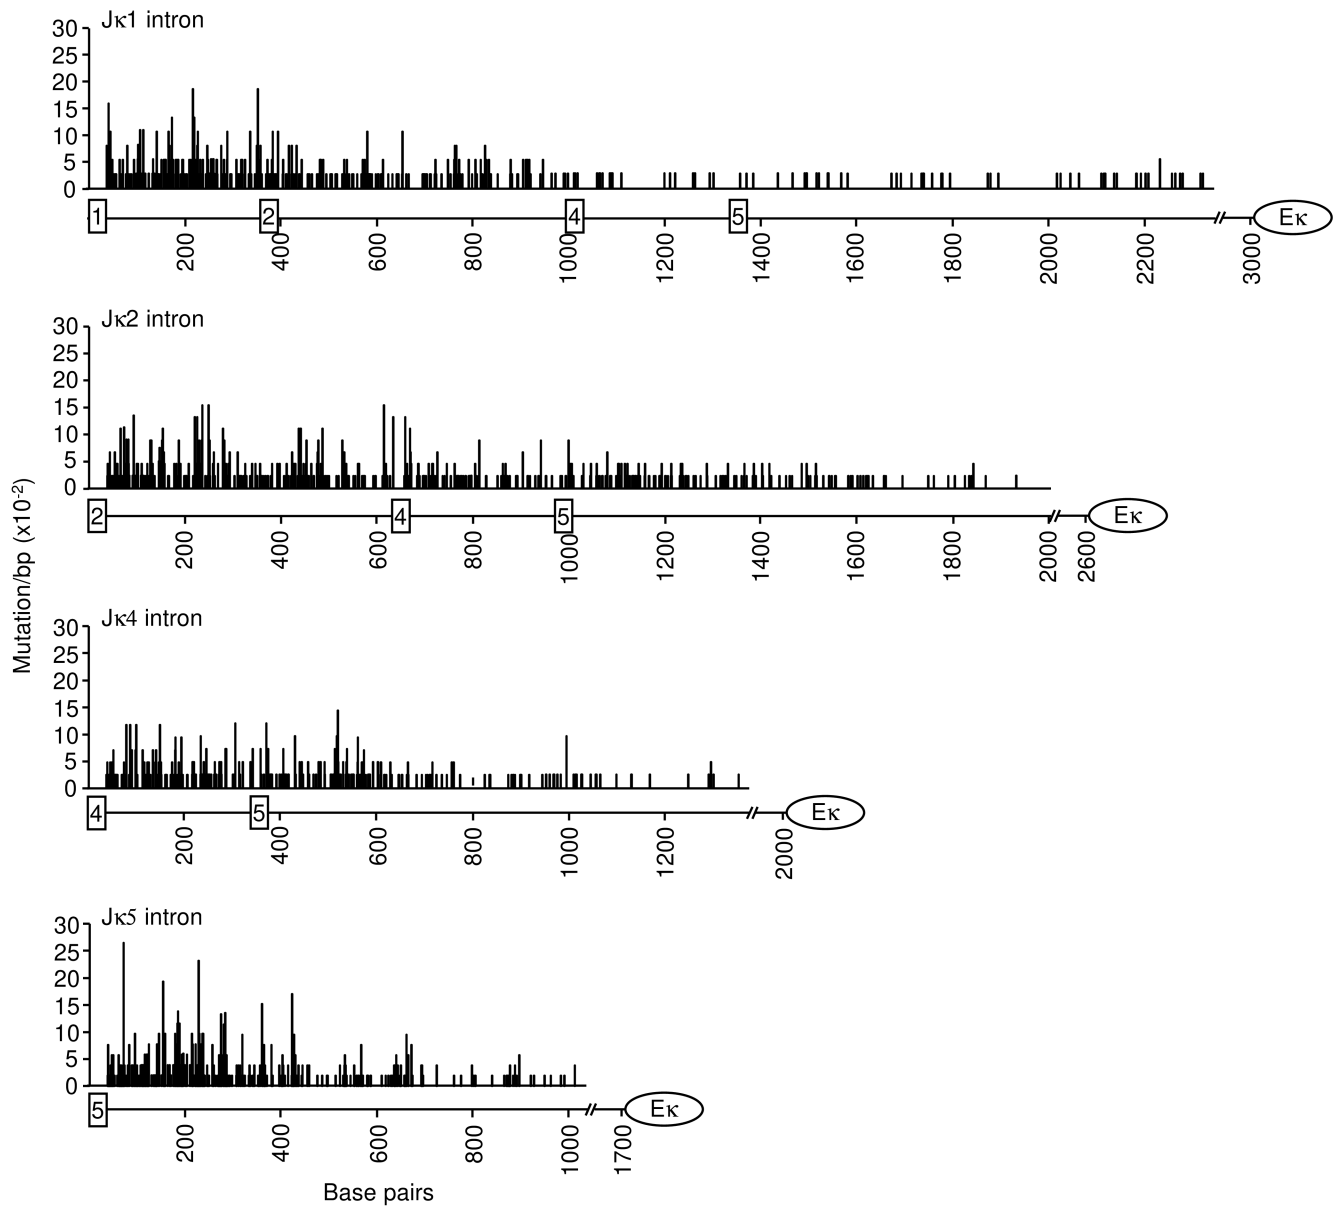

**FIGURE S2.** Mutational distribution in J<sub>κ</sub> intron sequences as in Fig. 3, aligned with the beginning of the utilized J segment. Black vertical lines represent the number of mutations/bp x 10<sup>2</sup> (y-axis) for each residue from VJ clones utilizing J<sub>κ</sub>1, J<sub>κ</sub>2, J<sub>κ</sub>4, and J<sub>κ</sub>5 genes. X-axis depicts the distance from the utilized J segment to E<sub>κ</sub>. Circle shows the position of the E<sub>κ</sub> intronic enhancer.
